# Supplementary material
Source: MDPI journal article supplement (https://www.mdpi.com/1999-4907/12/12/1618)
Supplement: s1 [file s1]

Table S1 Primer sequences used in cloning sequence

| Primer              | Sequence (5'-3')     |
|---------------------|----------------------|
| <i>PmMYB4-F</i>     | ATGAGCTGCACAACAGGAGG |
| <i>PmMYB4-R</i>     | TTAGCCAAAATAGATCTGAC |
| <i>ProPmMYB4-F</i>  | ATTCATCCCATTTTACCA   |
| <i>ProPmMYB4-R</i>  | AGAGTCCTCCTGTTGTGC   |
| <i>ProCCoAOMT-F</i> | TCCACCCTGGTCACTTTC   |
| <i>ProCCoAOMT-R</i> | TGGGTTGTCTGAGCCTTC   |
| <i>ProPAL-F</i>     | ATTCTTGGGACCACATTAC  |
| <i>ProPAL-R</i>     | CAGAGCAAAACCGAGCAG   |

Table S2 Primer sequences used in the construction of *pGBKT7-PmMYB4*

| Primer                 | Sequence (5'-3')                               |
|------------------------|------------------------------------------------|
| <i>pGBKT7-PmMYB4-F</i> | atggccatggaggccgaattcATGAGCTGCACAACAGGAGGA     |
| <i>pGBKT7-PmMYB4-R</i> | ccgctgcaggtcgacggatccGCCAAAATAGATCTGACCTAGCAGA |

Table S3 Primer sequences of genes analyzed by real-time RT-PCR.

| Primer              | Sequence (5'-3')                  |
|---------------------|-----------------------------------|
| <i>TUA-F</i>        | TGGCTCGAATGCACTGTTGG              |
| <i>TUA-R</i>        | TCAACCGCCTTGTCTCTCAGG             |
| <i>PmMYB4-F</i>     | CTCCCATCTCCAAACCCA                |
| <i>PmMYB4-R</i>     | TAATCCACCTCAGCCTAC                |
| <i>NbCCoAOMT-F1</i> | CTATGGAATGGATCAGTGGTTGC           |
| <i>NbCCoAOMT-R1</i> | CAACGGGAAGCTGACAGATTTC            |
| <i>NbCCoAOMT-F2</i> | TGAAATCTGTCAGCTTCCCGTTG           |
| <i>NbCCoAOMT-R2</i> | AGGTAACATCGAGAATGCAACCT           |
| <i>NbCCoAOMT-F3</i> | GCTAGTTCAAGGCAATGGAGGAT           |
| <i>NbCCoAOMT-R3</i> | GCAGTAGGTAACATCGAGAATGC           |
| <i>Nb4CL-F</i>      | GCAGCGATTTTGATTATGCAGA            |
| <i>Nb4CL-R</i>      | AGTTCTTTTCCTAATGGTGCAGC           |
| <i>NbHCT-F</i>      | AAAACACCACCAACCCTG                |
| <i>NbHCT-R</i>      | TCCTGCCAACATCTCGTA                |
| <i>NbPAL-F1</i>     | TGCCAACAGGATAAATGAATGCAG          |
| <i>NbPAL-R1</i>     | CACCATTCATTCCTTGAGACAT            |
| <i>NbPAL-F4</i>     | CCTAACAGGATTACAGAATGCAG           |
| <i>NbPAL-R4</i>     | CTCTTGAGGCACTCCAGCATTG            |
| <i>NbCAD-LIKE-F</i> | ATGAAGTGGTGGGAGAAG                |
| <i>NbCAD-LIKE-R</i> | GGGTTTGCCATCAGTGTA                |
| <i>NbRab8-1-F</i>   | ACTCTAGAATGGCTGCTCCACCTGCTAGAGCTA |
| <i>NbRab8-1-R</i>   | ATGGTACCAGAACCACAACAAGCTGATTTCTG  |

| Primer            | Sequence (5'-3')                 |
|-------------------|----------------------------------|
| <i>NbRab8-5-F</i> | ACTCTAGAATGGCCACTCCACCCGCTAGAGCT |
| <i>NbRab8-5-R</i> | ATGGTACCAGAGCCACAGCAAGCTGATTTTG  |
| <i>Actin-F</i>    | GAATCCACGAGACCACATACAAC          |
| <i>Actin-R</i>    | TTAATCTTCATGCTGCTTGGAGC          |

Table S4 Primer sequences used in the construction of *PmMYB4* overexpression lines.

| Primer             | Sequence (5'-3')                               |
|--------------------|------------------------------------------------|
| <i>PmMYB4-OE-F</i> | gagaacacgggggactctagaATGAGCTGCACAACAGGAGGA.    |
| <i>PmMYB4-OE-F</i> | ggactgaccacccgggatccTTAGCCAAAATAGATCTGACCTAGCA |

Table S5 Primer sequences used in the Y1H assay.

| Primer           | Sequence (5'-3')                               |
|------------------|------------------------------------------------|
| <i>MYB4-AD-F</i> | gccatggaggccagtgatcATGAGCTGCACAACAGGAGGA       |
| <i>MYB4-AD-R</i> | tatcgatgccaccctctagaTTAGCCAAAATAGATCTGACCTAGCA |
| <i>AC-I-F</i>    | AATTCACCTACCACCTACCACCTACCGAGCT                |
| <i>AC-I-R</i>    | CGGTAGGTGGTAGGTGGTAGGTG                        |
| <i>AC-II-F</i>   | AATTCACCAACCACCAACCACCAACCGAGCT                |
| <i>AC-II-R</i>   | CGGTTGGTGGTTGGTGGTTGGTG                        |
| <i>AC-III-F</i>  | AATTCACCTAACACCTAACACCTAACGAGCT                |
| <i>AC-III-R</i>  | CGTTAGGTGTTAGGTGTTAGGTG                        |
| <i>SMRE4-F</i>   | AATTCACCAACTACCAACTACCAACTGAGCT                |
| <i>SMRE4-R</i>   | CAGTTGGTAGTTGGTAGTTGGTG                        |
| <i>mAC</i>       | AATTCACCGAATACCGAATACCGAATGAGCT                |
| <i>mAC</i>       | CATTCGGTATTCGGTATTCGGTG                        |

Table S6 Primer sequences used in LUC/GUS activity assay.

| Primer                  | Sequence (5'-3')                                |
|-------------------------|-------------------------------------------------|
| <i>PmMYB4-SK-F</i>      | tccccgggctcgaggaattcATGAGCTGCACAACAGGAGGA       |
| <i>PmMYB4-SK-R</i>      | gtcgacggtatcgataagcttTTAGCCAAAATAGATCTGACCTAGCA |
| <i>ProCCoAOMT-LUC-F</i> | gtcgacggtatcgataagcttTCCACCCTGGTCACTT           |
| <i>ProCCoAOMT-LUC-R</i> | cgctctagaactagtgatccTTCTCAAAACGTGAAAACAGTTG     |
| <i>ProPAL-LUC-F</i>     | gtcgacggtatcgataagcttATTCTTGGGACCACATTACACACTAT |
| <i>ProPAL-LUC-R</i>     | cgctctagaactagtgatccCAGAGCAAAACCGAGCAGGG        |
| <i>PmMYB4-35S-F</i>     | gagaacacgggggactctagaATGAGCTGCACAACAGGAGGA.     |
| <i>PmMYB4-35S-R</i>     | ggactgaccacccgggatccTTAGCCAAAATAGATCTGACCTAGCA  |
| <i>ProCCoAOMT-GUS-F</i> | gagaacacgggggactctagaTCCACCCTGGTCACTTTCCG       |
